# Supplementary material
Source: PubMed Central journal article supplement (PMC3577299)
Supplement: jmbe-sm-13-1-59.pdf [file jmbe-sm-13-1-59.pdf]

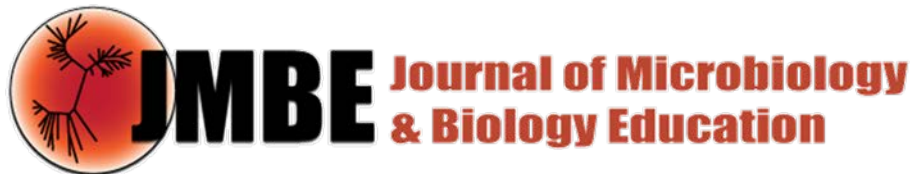

---

## Supplemental Materials

for

### The Microbial Contamination of Mobile Communication Devices

Joanna Verran

*School of Healthcare Science, Manchester Metropolitan University, Manchester M1  
5GD, UK*

### **Table of Contents**

(Total pages 2)

Appendix 1: Poster - Investigations Into the Microbial Contamination of Mobile Phones

# Investigations into the Microbial Contamination of Mobile Phones

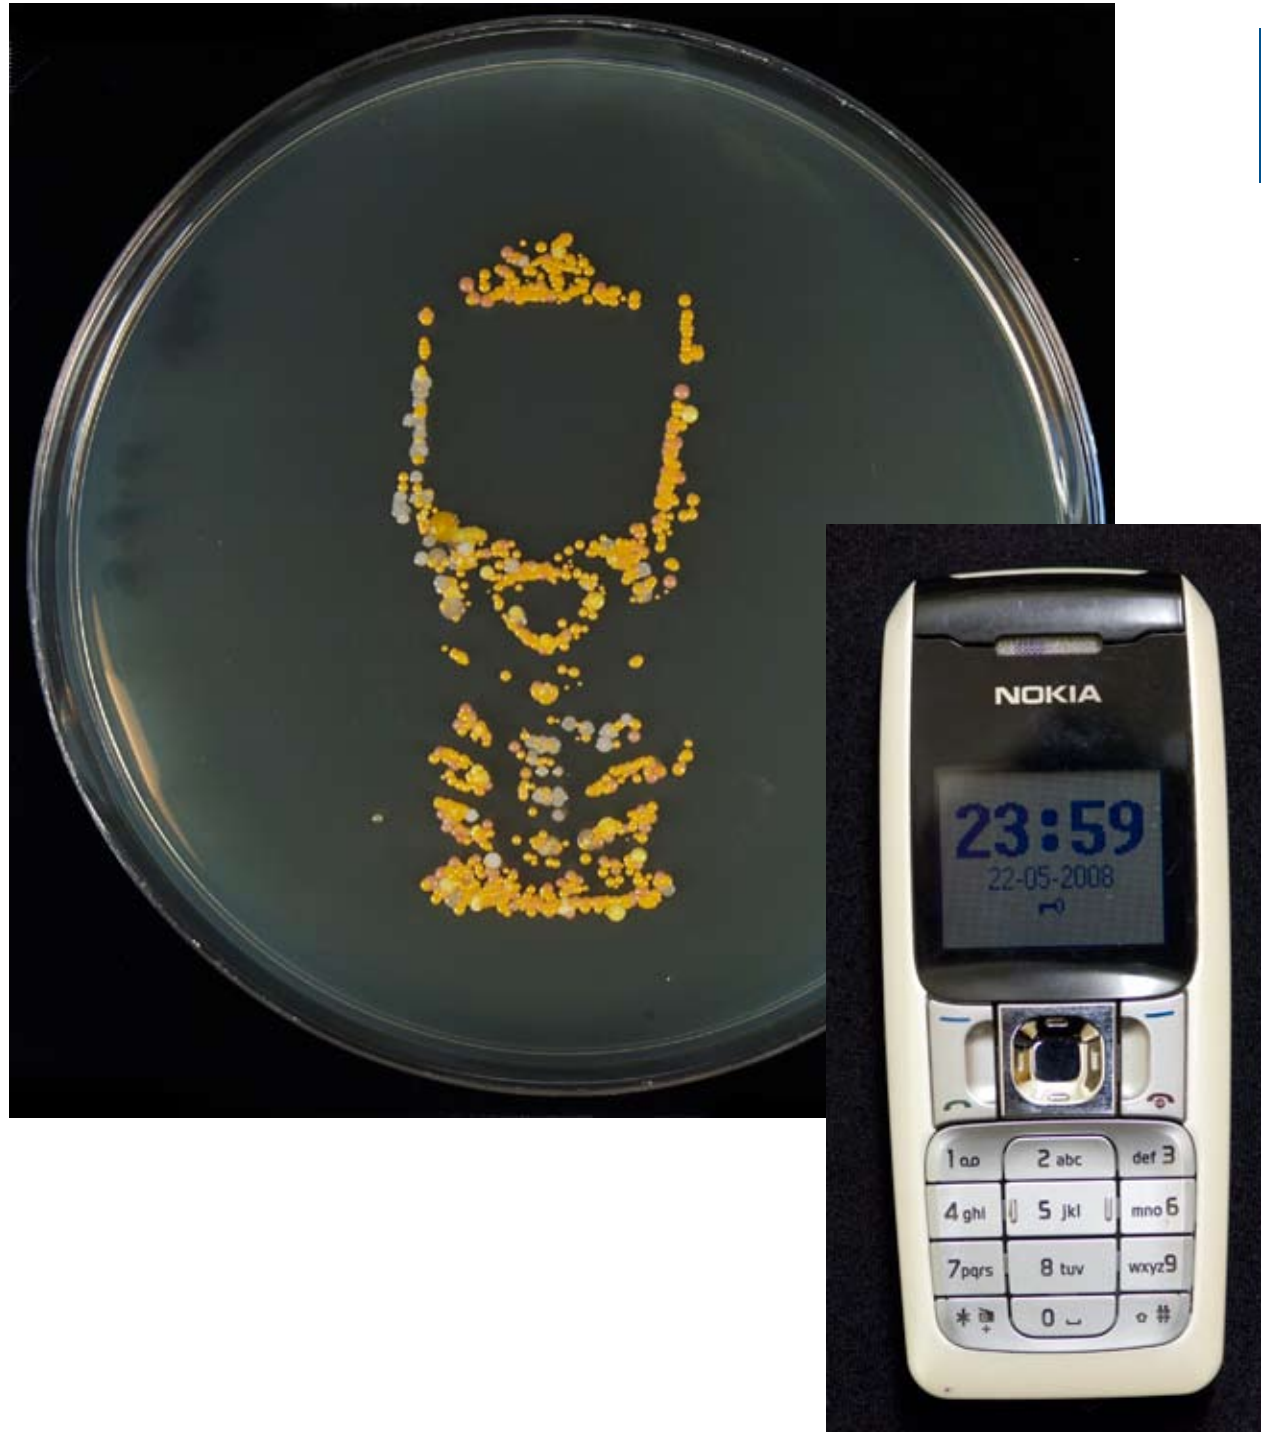

**J. Verran**  
Manchester Metropolitan University, Manchester UK.

## Introduction

Mobile phones and other frequently handled inert items have been implicated in cross-infection in the hospital environment (see references). This practical investigation arose partly due to this scientific information, and also as a result of some media coverage.

The Medical Microbiology module is a final year option, primarily for students taking Honours degrees in Biology and Biomedical Sciences. In the 07-08 session, 65 students enrolled. Laboratory classes comprised 4 x 4h sessions, each separated by a week (thus more than one exercise is carried out in any given session). The classes were run twice. Student: staff ratio was around 1:10.

### Aim :

To demonstrate the potential of inert, frequently handled items to facilitate cross-contamination, and to encourage students to consider such issues in the hospital setting.

### Objectives:

To isolate and identify common contaminants on a mobile phone, and to consider their origin, focusing particularly on presumptive staphylococci, and comparing the identity of those isolated from the phone with those isolated from the skin.

## Methods

The schedule was provided to students in advance of the class. Students record observations on the gapped schedule, and subsequently download new sheets from WebCT to produce the final report. The report was divided into two sections: the first required students to outline observations and explain underlying principles of microbiology via a 'gapped' question sheet; the second asked students to assess the source (skin flora?), and significance of contamination of inert objects in terms of cross-infection, particularly within the hospital setting.

A shortened version of the schedule follows:

**WEEK 1: ISOLATION**  
Work individually. Moisten a sterile swab in saline and swab your skin (eg hands, nose, ears, lips). Roll the swab firmly over the surface. Use the swab to inoculate a tryptone soy agar plate, using the isolation plate technique to ensure separation of colonies. Draw a diagram to show how you inoculated the plate. Firmly press your mobile phone (if you have one) onto a large agar plate OR if you have a flip phone, use a moistened swab to sample the surface (particularly those that come into contact with mouth, ears, fingers). Inoculate the plate with the swab to ensure maximum yield of colonies. Draw a diagram to show how you inoculated the plate. Use the medicated wipes provided to clean your phone. Then resample (either by pressing onto agar, or by swabbing, as before). Wipe the phone again. Incubate plates 37° 24 h.

**WEEK 2: PURIFICATION**  
1. Take digital pictures of the mobile phone plates which you inoculated last week.  
REPEAT THE PHONE SAMPLING – ie press or swab, before and after cleaning. (Wipe clean again after second sampling)  
2. Looking at last week's plates, describe any differences between the microflora of the two sites (phone pre-clean, and skin) and explain why they occur. It is likely that some of these colonies will be staphylococci. Why might this be? Have you got any colonies which are 'presumptive staph' on both skin and phone? What are the typical colony morphologies of staphylococci (text book)?  
3. Subculture one colony of each of your presumptive staphylococci onto mannitol salt agar and nutrient agar to obtain pure cultures on selective and non selective media for identification ('isolation plates'). What is in mannitol salt agar, and why is it used? Why do you usually need a pure culture on a non-selective medium (as opposed to a selective medium) for identification (skin swabs)?  
4. What other colonies were present on your mobile phone and skin swabs? Do Gram stains, and suggest identification and sources of these organisms.

**WEEK 3: IDENTIFICATION**  
1. Take digital pictures of the mobile phone plates which you inoculated last week.  
REPEAT THE PHONE SAMPLING – ie press or swab, before and after cleaning. Wipe clean after sampling.  
2. Look at the isolation plates you set up last week. Check the cultures are pure. Do the colonies look like those you subcultured? Use the non-selective medium from now on. You must have pure cultures for the identification test. To confirm Staphylococcus genus, perform Gram stain and catalase test.  
For the following tests you must have a positive control (S.aureus). Lab cultures are provided.  
To identify species, perform  
-- latex agglutination test (for coagulase and protein A – confirmatory for S.aureus)  
-- API staph for coagulase negative staphylococci (CNS) only.  
Construct a table summarising the properties of your isolates, and state their identities.  
Paste in any API printouts (results week 4)  
3. ANTIBIOTIC SENSITIVITIES Set up a plate to show antibiotic sensitivities of two of your isolates (eg one from skin and one from phone, with similar colony morphologies).  
**WEEK 4: FINAL WORK**  
Take digital pictures of the mobile phone plates which you inoculated last week. Identify any isolates via API system. Measure zones of inhibition for antibiotic sensitivities.  
**For your report:**  
Insert photos from the three cleaning protocols (agar plates before and after cleaning). Comment on the experiment and the results you obtained. Can you comment on mobile phone contamination (extent, origin, type of microorganisms, ease of cleaning, importance of cleaning, buildup of contamination etc)? Do you see any hygiene or cross-contamination issues in this context? Were there differences between phones/people? Compare drug resistance and other results of your isolates and discuss implications. Are you concerned? Are you a carrier? What other inanimate objects might pose comparable cross-contamination issues? Look for references illustrating similar work. Discuss in the light of lectures and literature. State references.

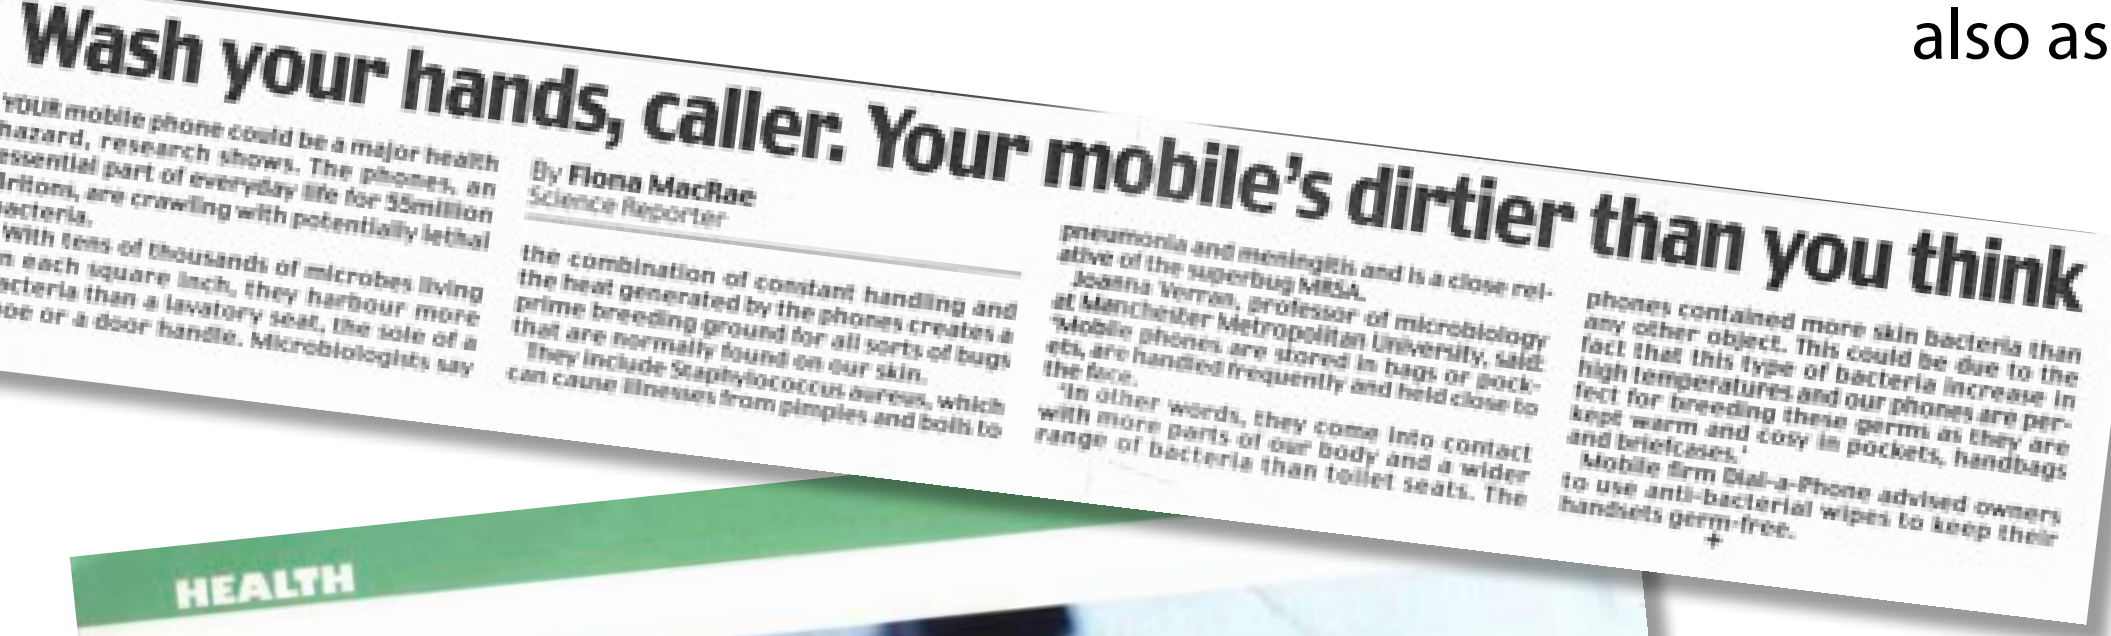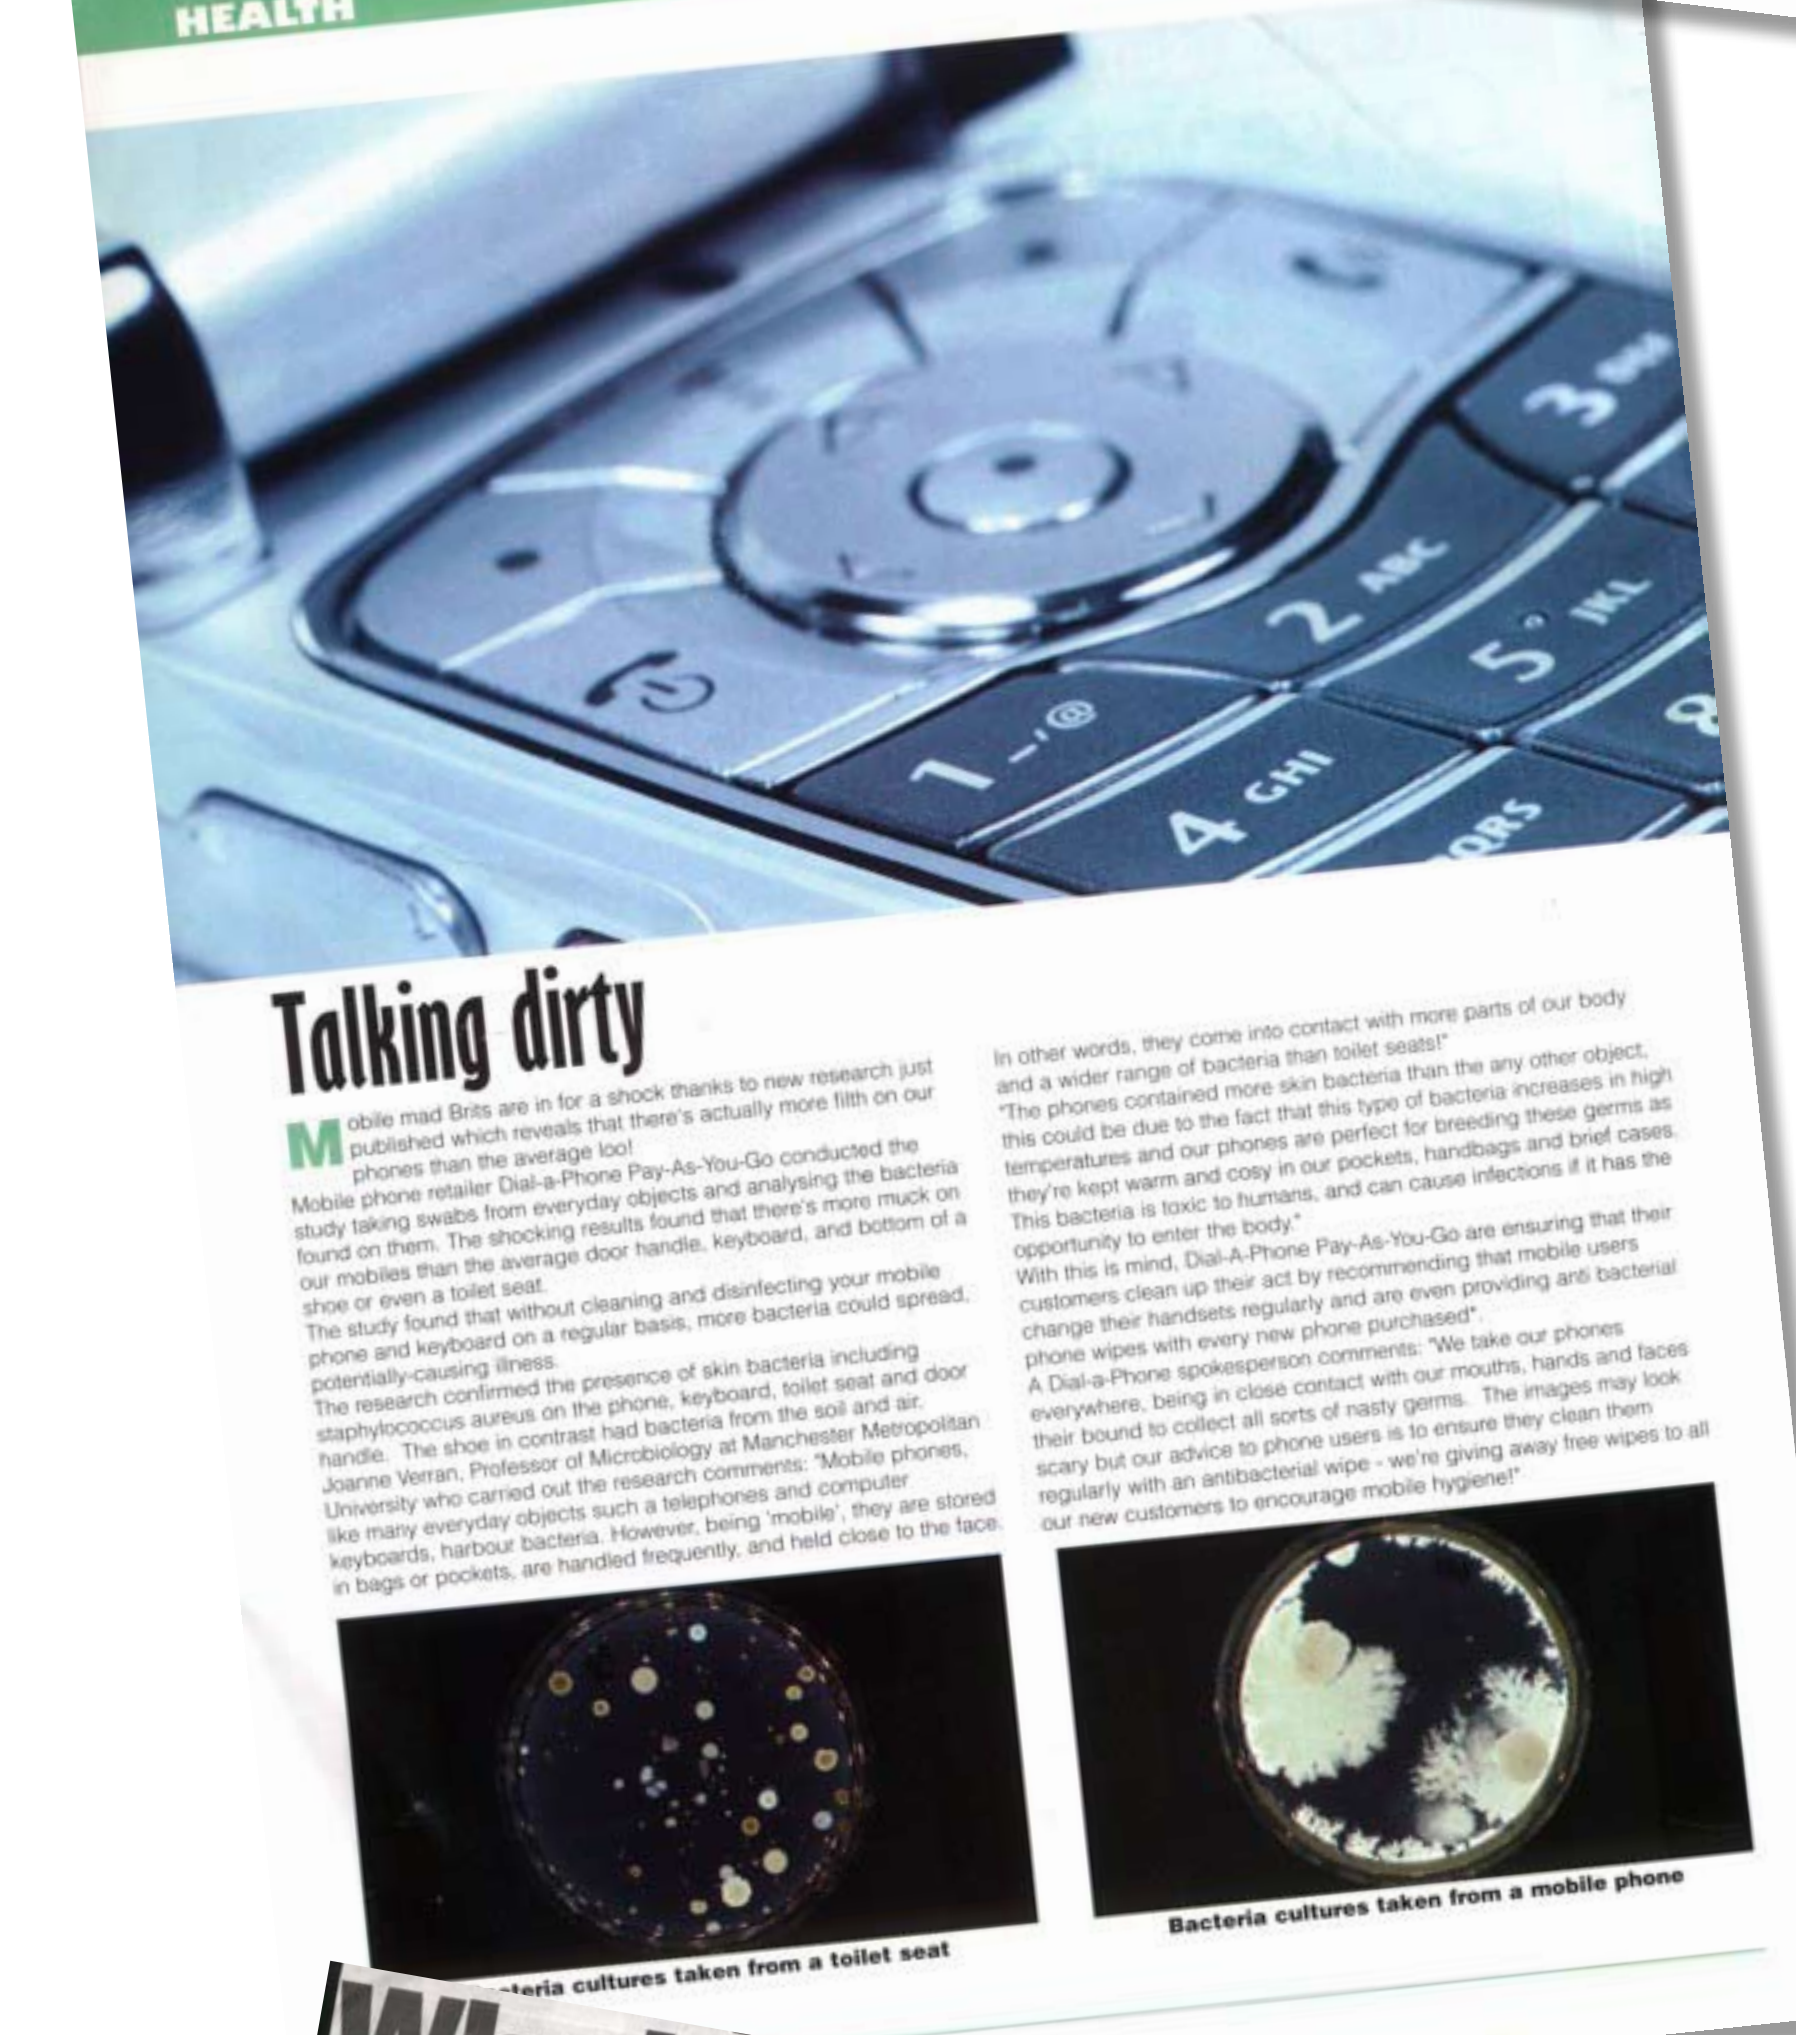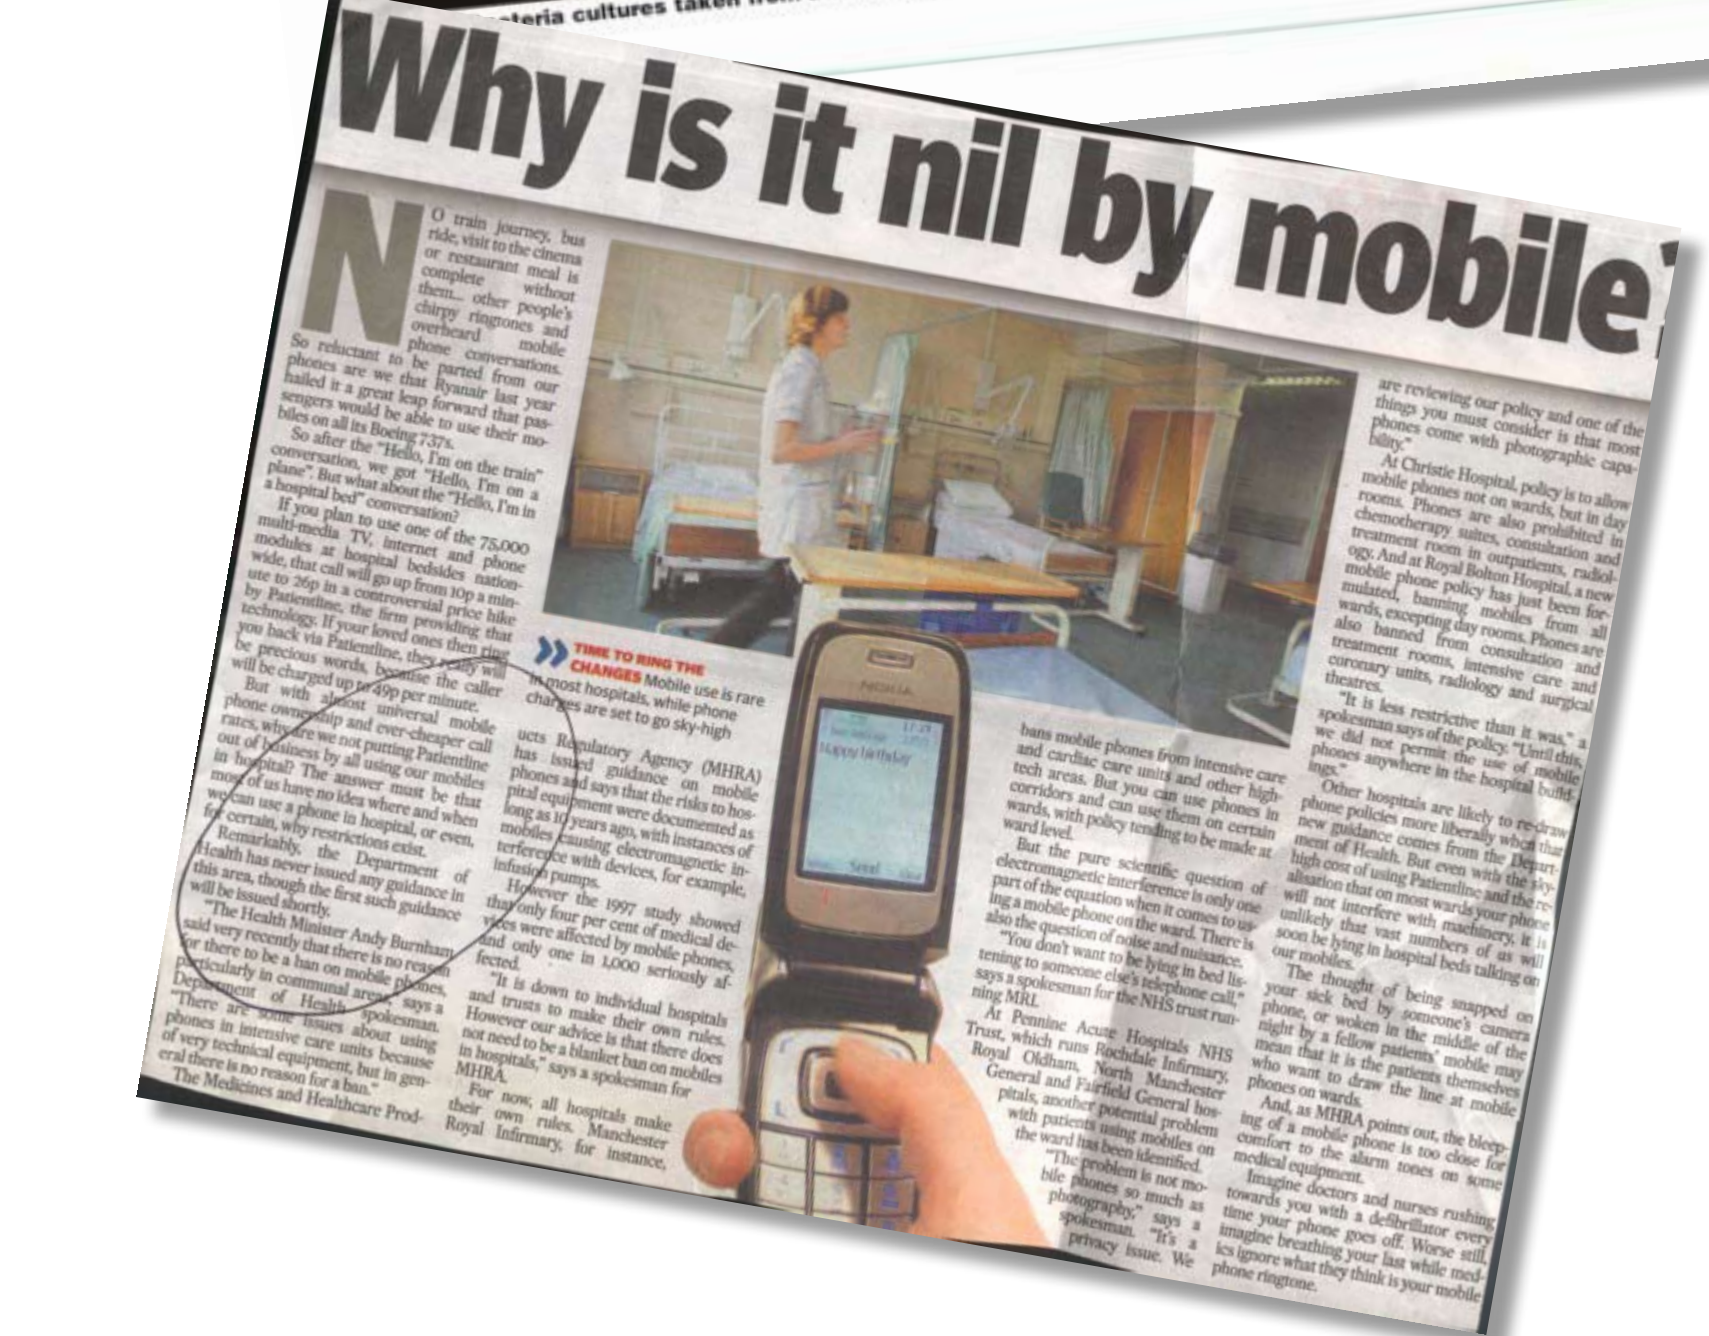

**References**

Brady RR et al. 2006. Is your phone bugged? The incidence of bacteria known to cause nosocomial infection on healthcare workers' mobile phones. J Hosp Infect 62:123-5.  
Bures S, Fishbain JT, Uyejara CFI, Parker JM, Berg BW. 2000. Computer keyboards and faucet handles as reservoirs of nosocomial pathogens in the intensive care unit. Amer J Infect Control 28: 465 - 470.  
French G, Rayner D, Branson M, Walsh, M. 1998. Contamination of doctors' and nurses' pens with nosocomial pathogens. The Lancet 351: 213.  
Singh D, Kaur H, Gardner WG, Treen LB. 2002. Bacterial contamination of hospital papers. Infect Control and Hosp Epidemiol 23: 274-276.  
Tunc K and Olgun U. 2006. Microbiology of public telephones. J. Infect. 53: 140 - 143.  
Young JM, Naqvi M, Richards L. 2005. Microbial contamination of hospital bed handsets. Amer J Infect Control 33: 170 - 174.

## Results

Of the 63 students who submitted work, marks were as follows:

| Mark (%)     | 0 - 20 | 21 - 40 | 41 - 60 | 61 - 80 | 81 - 100 |
|--------------|--------|---------|---------|---------|----------|
| No. students | 2      | 10      | 24      | 19      | 8        |

Low marks were awarded due to non-completion of the gapped questions and an absence of an exploratory/explanatory text.

All students were able to demonstrate contamination of phones, and recognised the transient and nature of the contamination (variation from week to week; comparison with other students). (Fig 1 a-c).

Antimicrobial wipes reduced contamination, particularly on smooth areas of the phone. Not all wipes were antibacterial. (Fig 2).

Some students were able to isolate similar species of staphylococci from phone and skin. Most isolated micrococci from their phones. Bacillus spp. were also isolated. None isolated Staphylococcus aureus.

**Figure 1**

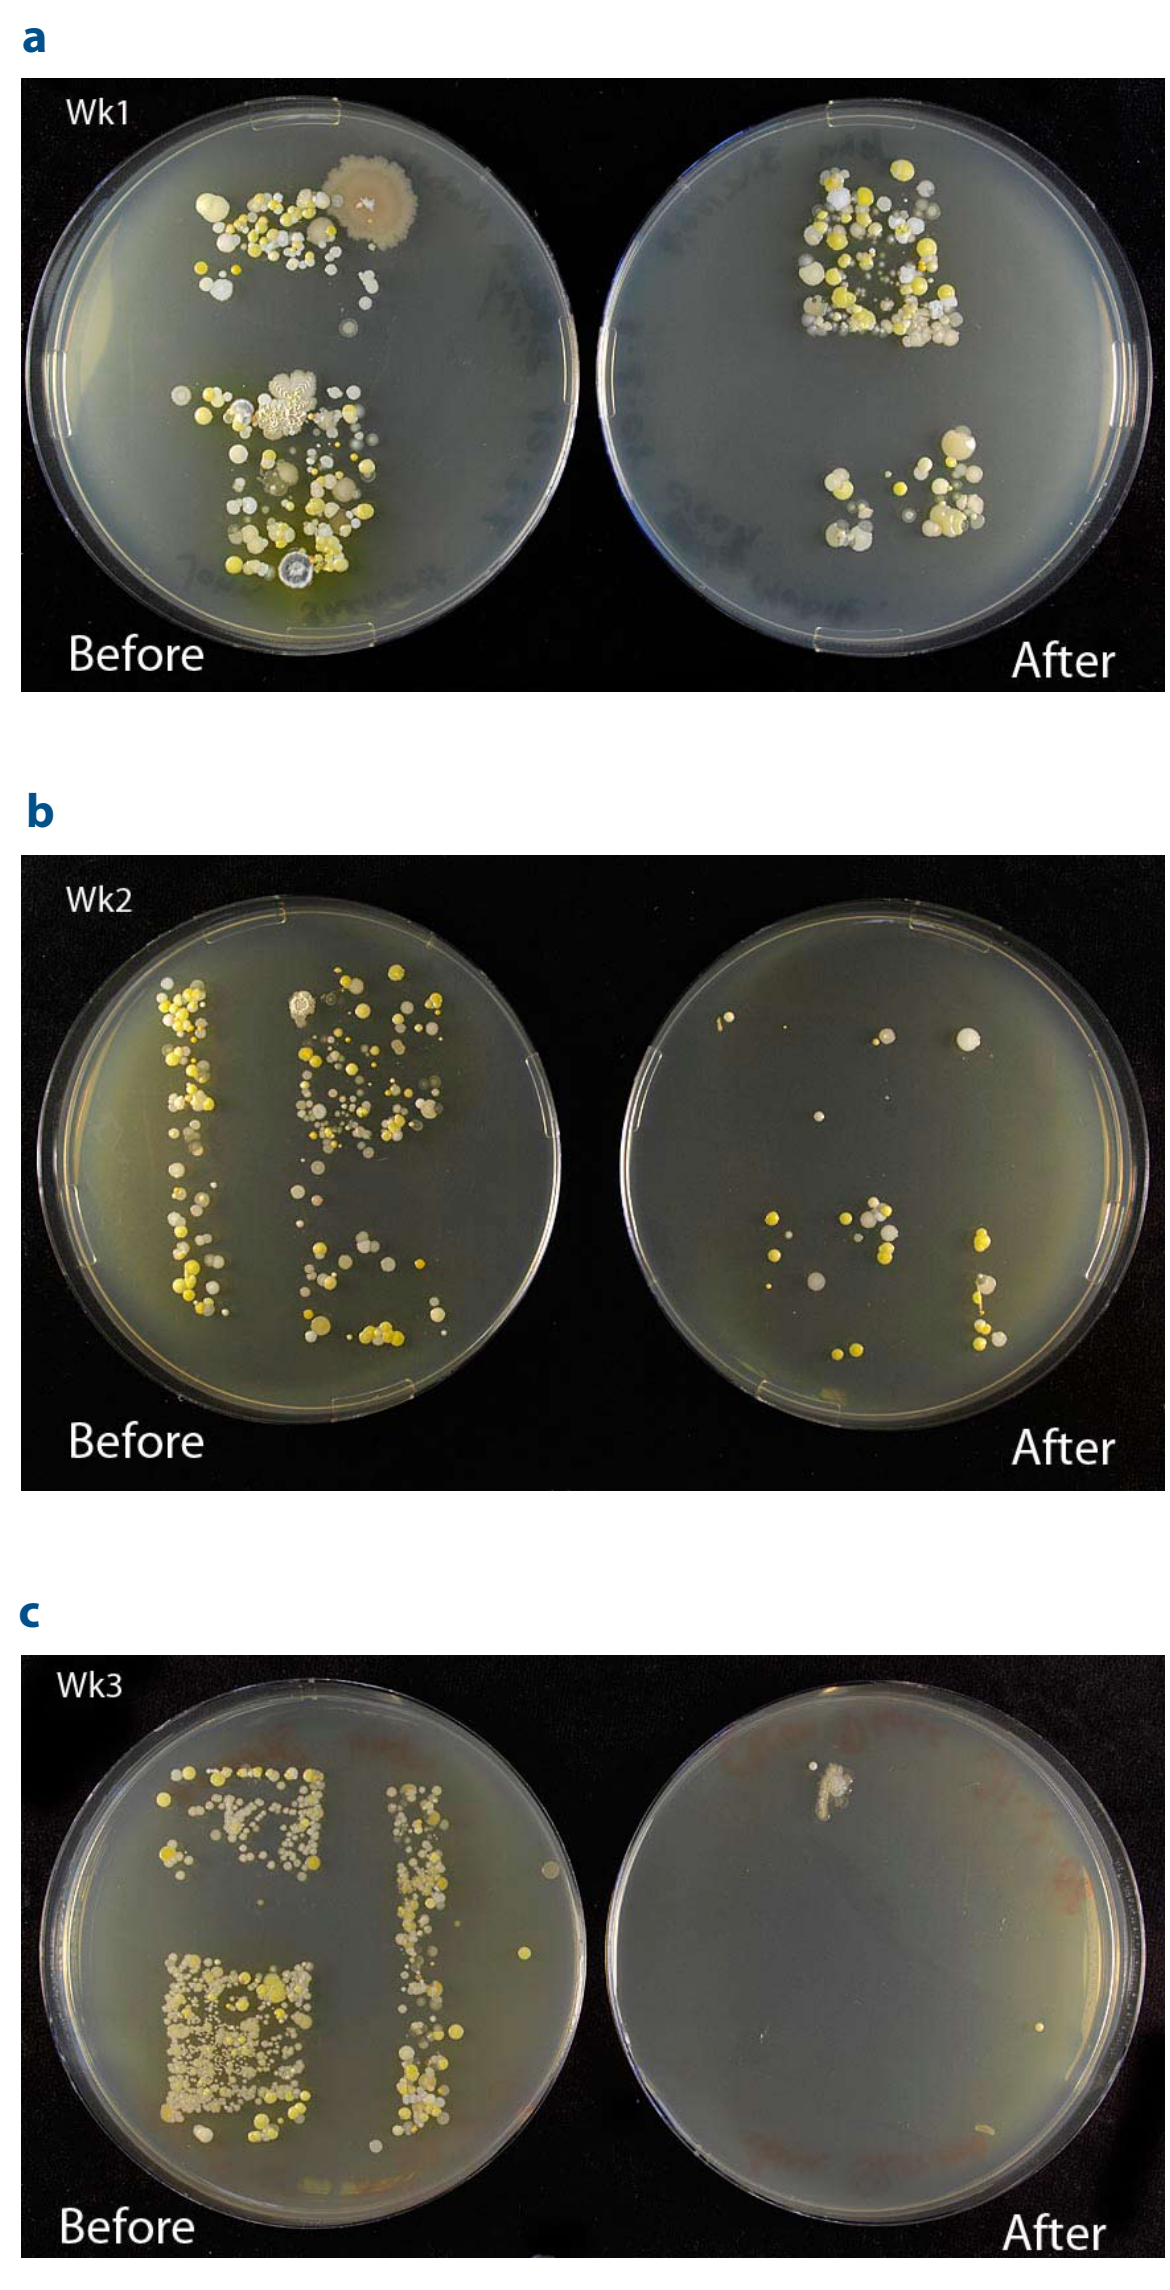

**Figure 2**

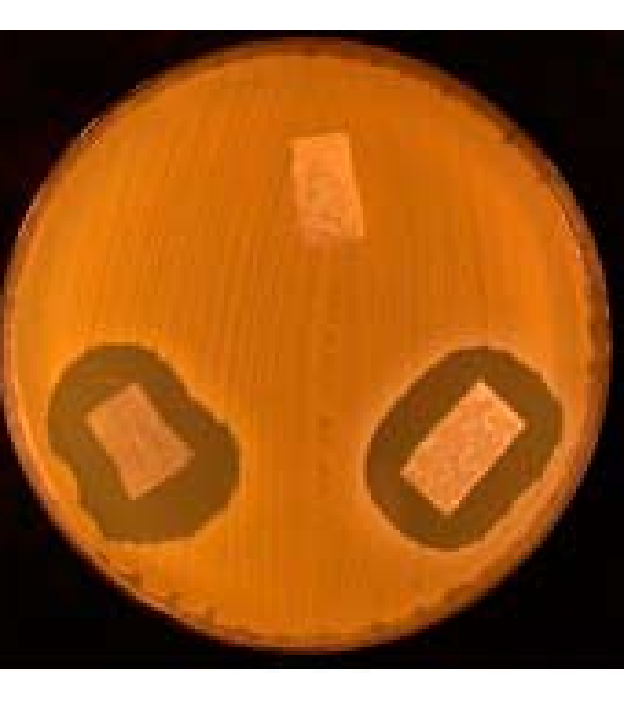

## Evaluation

The exercise was evaluated by written questionnaire, to which 38 responses were provided.

### Responses to Question 1 (What did you think of the mobile phone practical overall?)

| Positive                                                                                                                         | Negative             |
|----------------------------------------------------------------------------------------------------------------------------------|----------------------|
| Good                                                                                                                             | Long and unorganised |
| It was interesting and simple                                                                                                    | Not very good        |
| Practical was good- learned how to identify colonies                                                                             |                      |
| I really enjoyed the practical it was very interesting                                                                           |                      |
| It was a good practical                                                                                                          | In between           |
| It was good, I enjoyed it, it was fun                                                                                            | Ok, too long         |
| Interesting practical, fun, visual bacteria                                                                                      | Ok                   |
| Very good                                                                                                                        |                      |
| Exciting, enjoyed every bit of the practical                                                                                     |                      |
| It was a good idea, esp. since everybody has a mobile now                                                                        |                      |
| Was good and informative                                                                                                         |                      |
| It was well presented and easy to understand, the lecturers managed to convey their enthusiasm for the subject matter well       |                      |
| Very interesting                                                                                                                 |                      |
| Good but very lengthy with lab report, was very interesting though. Practicals should have been worth more though                |                      |
| Was good and interesting to do but was also quite all over the place with several parts not clearly outlined                     |                      |
| Separation from other experiments/practicals not clearly outlined                                                                |                      |
| Quite interesting to actually see the flora present on an inanimate object instead of just being told they were there            |                      |
| It was interesting to see the range of organisms that are carried on the skin and those which are picked up from the environment |                      |
| Informative                                                                                                                      |                      |
| Confusing, but overall interesting                                                                                               |                      |
| I enjoyed it but the timing was rubbish as we had our dissertation deadline then too                                             |                      |
| Interesting, possibly best practical of my third year                                                                            |                      |
| It was interesting though hard to get results                                                                                    |                      |
| Very interesting & enjoyable                                                                                                     |                      |
| It was interesting, possibly not as challenging as the other practicals we were set. Instead of a write-up could do a worksheet? |                      |
| Very good as it linked in with what we were studying in the lectures and helped in learning                                      |                      |
| Very positive                                                                                                                    |                      |
| Interesting, made it more fun to do, learnt more that way                                                                        |                      |
| Very good- alerting, informative and interesting                                                                                 |                      |

### Responses to Question 2 (What was the best aspect?)

|                                                                                                                                             |
|---------------------------------------------------------------------------------------------------------------------------------------------|
| Practical based                                                                                                                             |
| Just seeing the sheer amount of different bacterial species that were on your phone                                                         |
| Its hands on and really does show that microbes are part of everyday life                                                                   |
| Seeing what grew on the plate after week 1 (was pretty disgusting)                                                                          |
| Finding how much bacteria was on your phone                                                                                                 |
| The phone itself                                                                                                                            |
| Seeing what was on own item                                                                                                                 |
| Visualising the organisms                                                                                                                   |
| Realising just how much bacteria is present on the mobile                                                                                   |
| Seeing the pictures                                                                                                                         |
| Visualisation and isolation of organisms                                                                                                    |
| Learning new diagnostic tests                                                                                                               |
| Detecting the normal flora                                                                                                                  |
| Culturing imprint of mobile phone to see what is found on it                                                                                |
| Getting to identify organisms on phone and compare with skin                                                                                |
| Seeing the results                                                                                                                          |
| Seeing if I carried any potentially pathogenic organisms                                                                                    |
| Plates stamping                                                                                                                             |
| Eye-opener, made you question possible contaminants and what may be lurking. Personal- using own mobile phone gave a fun, personal approach |
| Practical                                                                                                                                   |
| Seeing what organisms are found on a phone                                                                                                  |
| Plating the phones                                                                                                                          |
| Discovering how contaminated phones can be, as well as the whole variety of contaminants possible                                           |
| Realising how much my phone was contaminated!                                                                                               |
| API strips                                                                                                                                  |
| Everything was really good, especially looking at the amount of germs present and relationship between phone and skin                       |
| All the staff in the unit were much more helpful than any other unit                                                                        |
| It gave a good insight into microbial skin populations and their different types                                                            |
| Different, learnt stuff that applied to you- as you used your own mobile                                                                    |
| Seeing what we were carrying, and how the phone became contaminated over the week                                                           |

### Responses to Question 3 (What parts could have been improved?)

|                                                                                                                                                                                                                       |
|-----------------------------------------------------------------------------------------------------------------------------------------------------------------------------------------------------------------------|
| Organisation                                                                                                                                                                                                          |
| More time given. Three practical together was quite difficult. Needed to be slower/ more spaced out so that could understand what was going on! VERY RUSHED                                                           |
| It got a bit hectic some weeks doing 3 pracs all at the same time                                                                                                                                                     |
| I think the length of time but that can not be changed due to obvious incubation times                                                                                                                                |
| Not sure really I thought it was pretty well organised                                                                                                                                                                |
| All parts                                                                                                                                                                                                             |
| Mine was really boring with a few dots                                                                                                                                                                                |
| The lab reports are only worth 10% each and I think there was a lot of work needed for each report                                                                                                                    |
| Too many practicals on the go at once                                                                                                                                                                                 |
| More stringent controls on which wipes used. Perhaps setting up different groups and comparing the effectiveness of certain types of wipes. For example to find out if antibacterial wipes are worth paying extra for |
| More help identifying bacteria                                                                                                                                                                                        |
| Should be worth more % for detail required                                                                                                                                                                            |
| The organisation and layout of work and experiments                                                                                                                                                                   |
| Isolation/culturing of pure isolates proved tricky                                                                                                                                                                    |
| I don't think it needed to be done every week                                                                                                                                                                         |
| Write-up too difficult                                                                                                                                                                                                |
| Separation from other experiments/practicals been run, confusing to know why we were doing what we did                                                                                                                |
| Not have such a huge write-up when other deadlines (dissertation) are due in                                                                                                                                          |
| The queuing for photos                                                                                                                                                                                                |
| This year the practical was hectic, having 3 practicals on the go each week made it difficult                                                                                                                         |
| Time, number of students per prac decreased                                                                                                                                                                           |
| I thought there was a bit too much going on in the practical at one time                                                                                                                                              |
| A group demonstration at the end of the practical to see what everyone found and the changes                                                                                                                          |
| Too many things all added together- had to do other practicals too, could spread it out more not mix up different practicals in one day-confusing                                                                     |
| Storage of the plates-some became lost. Also the last session was INCREDIBLY rushed- very stressful!                                                                                                                  |

### Responses to Question 4 (Do you think the mobile phone practical would make a good exercise in future medical microbiology units?)

| Positive                                                                              | Negative                                |
|---------------------------------------------------------------------------------------|-----------------------------------------|
| Yes, it was extremely interesting and a bit more fun                                  | Definitely not                          |
| Definitely                                                                            |                                         |
| Yes, I learn things better if I enjoy them I'm sure that's true to others too         |                                         |
| Yes, it was interesting                                                               |                                         |
| Yes I do                                                                              | In between                              |
| Yes, because it demonstrates the fluidity of what's on different peoples phones       | Possibly if results could be guaranteed |
| Yes. Its interesting to see the range of organisms we come into contact with everyday |                                         |
| Yes- improved write-up theory                                                         |                                         |
| Definitely! Once over the confusion, was great learning tool                          |                                         |
| Possibly if results could be guaranteed                                               |                                         |
| Yes as I really enjoyed it                                                            |                                         |

## Conclusions

As with all new lab classes, several improvements can be made to its efficient and effective operation. However, students clearly enjoyed the exercise, and it was apparent that learning had taken place.

The class will be run in 08-09, with an alteration in assessment emphasis (in-class assessment only of other concurrent experiments, with the mobile phone report as the key laboratory assessment)
